# Supplementary material
Source: Springer Nature journal article supplement (https://www.springerprofessional.de/resource/supplementary/40008_2012_16_MOESM4_ESM.pdf/11899446)

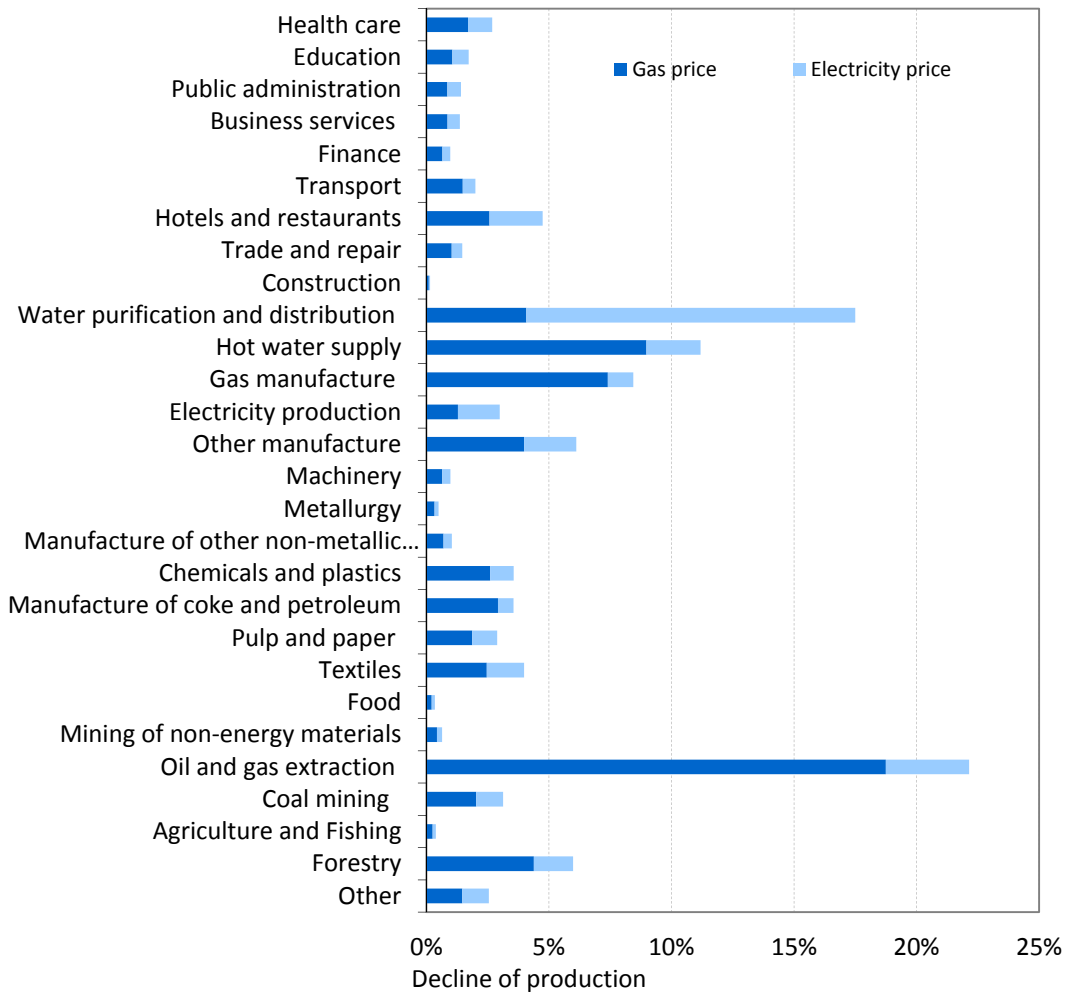

Supplement: MOESM4 [file 11899446]
